# Supplementary material for: Exploring autonomic modulation: day-to-day recovery after exercise sessions in breast cancer survivors
Source: PubMed Central journal article supplement (PMC10442838; doi:10.3389/fonc.2023.1231683), 2023-08-08
Supplement: Table_1.pdf [file Table_1.pdf]

## Supplementary data

**Table S1.** Participants' breast cancer type and chemotherapy treatment received prior to the study.

| Patient | Breast cancer type                                                                                                                                                                                                                                                    | Chemotherapy treatment                                                                   |
|---------|-----------------------------------------------------------------------------------------------------------------------------------------------------------------------------------------------------------------------------------------------------------------------|------------------------------------------------------------------------------------------|
| 1       | Bilateral infiltrating ductal carcinoma<br>a) cT2N2a G3, ypT1b ypN1 (3+/21), ER (+++) 95%; PR (+,++) 10-20%; Ki-67: 20-25%; Herceptest negative)<br>b) cTbN0 G1, ypT1b pN0gc; ER (+++) 95 %, PR(+++) 80 %, Ki-67: 5 %, HERCEP-TEST: Negative (+). Luminal phenotype A | Induction (paclitaxel and taxol)                                                         |
| 2       | Moderately differentiated infiltrating ductal carcinoma (IHQ RE positive (+++) 100%; RP Positive (++) in 50%; Ki-67: Positive 20-25 %; equivocal Herceptest with not amplified). T2N1M0 bifocal. ypT1c ypN1 Mx luminal phenotype A.                                   | Neoadjuvant (taxotere adriblastina cyclophosphamide, docetxel-adriamicinaciclofosfamide) |
| 3       | Infiltrating ductal carcinoma, G1, cT3 cN1, HR positive, Ki67 24%, HER2-, ypT2, ypN1a (1+/27). Luminal phenotype B.                                                                                                                                                   | Neoadjuvant (Adriamycin - cyclophosphamide and taxol)                                    |
| 4       | Infiltrating multicentric carcinoma with medullary features G3 cT1cmN1M0, ypT1ypN1M0. ER+++ /RP-, Ki-67: 40%, HER2- Luminal phenotype B.                                                                                                                              | Neoadjuvant (Adriamycin/Cyclophosphamide and paclitaxel)                                 |
| 5       | Infiltrating ductal carcinoma pT1c pN0 Mx, triple negative, Ki-67: 60%.                                                                                                                                                                                               | Neoadjuvant (carboplatin-Abraxane and adriamycin-cyclophosphamide).                      |
| 6       | Infiltrating lobular carcinoma cT3 cN0 M0, RH+/HER2-/Ki67 15-20%, luminal phenotype A.                                                                                                                                                                                | Neoadjuvant (adriamycin - cyclophosphamide and paclitaxel)                               |
| 7       | Infiltrating lobular carcinoma G2 pT3m pN1mi Mx, luminal phenotype B.                                                                                                                                                                                                 | Adjuvant (Taxol and adriamycin - cyclophosphamide)                                       |
| 8       | Infiltrating ductal carcinoma, pT1c pN0, luminal B pT1cpN0, G3. RH-positive, Her2-negative                                                                                                                                                                            | Neoadjuvant (adriamycin - cyclophosphamide)                                              |
| 9       | Multicentric carcinoma pT2 pN0i+, luminal A, and ER (+++) 95%, PR (++) 70%, HER2 negative and Ki67 of 15%,<br>And an invasive lobular carcinoma with ER (+++) 95%, PR (++) 80%, HER2 negative and Ki67 10%. Luminal phenotype A.                                      | Adjuvant (Taxol and adriamycin - cyclophosphamide)                                       |
| 10      | Infiltrating ductal carcinoma g3, pT1c pN1mi (2/9) Mx (Stage IB) with vascular/lymphatic invasion. ER+/RP+ Ki67: 85%, Her2 -. Luminal phenotype B                                                                                                                     | Adjuvant ( adriamycin - cyclophosphamide and paclitaxel)                                 |
| 11      | Infiltrating lobular carcinoma, G2, cT1c cN0, ER+++ , RP+++ , Ki67 15-20%, Her2 negative, luminal phenotype B.                                                                                                                                                        | Adjuvant ( adriamycin - cyclophosphamide and paclitaxel)                                 |
| 12      | Infiltrating ductal carcinoma, G2, cT2N1, triple negative, Ki 67 89%.                                                                                                                                                                                                 | Neoadjuvant (carboplatin-Abraxane and adriamycin-cyclophosphamide)                       |
| 13      | Multicentric infiltrating ductal carcinoma, G2, pT2, pN1(mi), Mx, luminal B phenotype                                                                                                                                                                                 | Adjuvant (Taxol and adriamycin - cyclophosphamide)                                       |
| 14      | Infiltrating ductal carcinoma cT4cN1M0, ypT3ypN2aM0, G3, Re and RP positive, Her2 negative, Ki67: 30%, luminal B phenotype                                                                                                                                            | Neoadjuvant (adriamycin - cyclophosphamide and paclitaxel)                               |
| 15      | Bifocal infiltrating ductal carcinoma, luminal B, G2, ER +++ 95 %, RP ++ 60-70 %, Ki67 20-25% in the largest, and Ki67 of 10-15%.                                                                                                                                     | Neoadjuvant (adriamycin - cyclophosphamide and paclitaxel)                               |
| 16      | Differentiated infiltrating carcinoma of medullary features T1-2N0Mx RE/RP/her2 negative, Ki 80%. Triple-negative.                                                                                                                                                    | Neoadjuvant (carboplatin-Abraxane and adriamycin-cyclophosphamide)                       |
